# Supplementary material for: Surfactants, Nanomedicines and Nanocarriers: A Critical Evaluation on Clinical Trials
Source: PubMed Central journal article supplement (PMC7999832; doi:10.3390/pharmaceutics13030381), 2021-03-13
Supplement: pharmaceutics-13-00381-s001.pdf [file pharmaceutics-13-00381-s001.pdf]

# Supplementary Materials: Surfactants, Nanomedicines and Nanocarriers: A Critical Evaluation on Clinical Trials

Diego Alejandro Dri, Carlotta Marianecchi, Maria Carafa, Elisa Gaucci and Donatella Gramaglia

Table S1. Chemical structures of surfactants reported in Table 1.

| Surfactant                                               | Structure                                                                                                                                                                                                                                                                         |                         |                        |                         |               |     |       |  |     |        |
|----------------------------------------------------------|-----------------------------------------------------------------------------------------------------------------------------------------------------------------------------------------------------------------------------------------------------------------------------------|-------------------------|------------------------|-------------------------|---------------|-----|-------|--|-----|--------|
| Lauroyl polyoxyl-32 glycerides<br>(Gelucire 44/14)       | 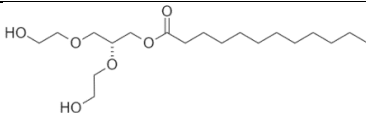                                                                                                                                                                                                |                         |                        |                         |               |     |       |  |     |        |
| Mannide monooleate                                       |                                                                                                                                                                                                 |                         |                        |                         |               |     |       |  |     |        |
| Sodium lauryl sulfate                                    |                                                                                                                                                                                                 |                         |                        |                         |               |     |       |  |     |        |
| Polyoxyl 40 hydrogenated castor oil                      | <br>( $x + y + z = 40$ )                                                                                                                                                                       |                         |                        |                         |               |     |       |  |     |        |
| Poloxamer 188<br>(Pluronic F-68)                         | <br>The label states the type of poloxamer                                                                                                                                                    |                         |                        |                         |               |     |       |  |     |        |
|                                                          | <table border="1"> <thead> <tr> <th>Poloxamer Type</th> <th>Ethylene Oxide Units a</th> <th>Propylene Oxide Units b</th> </tr> </thead> <tbody> <tr> <td>Poloxamer 407</td> <td>188</td> <td>75–85</td> </tr> <tr> <td></td> <td>407</td> <td>95–105</td> </tr> </tbody> </table> | Poloxamer Type          | Ethylene Oxide Units a | Propylene Oxide Units b | Poloxamer 407 | 188 | 75–85 |  | 407 | 95–105 |
| Poloxamer Type                                           | Ethylene Oxide Units a                                                                                                                                                                                                                                                            | Propylene Oxide Units b |                        |                         |               |     |       |  |     |        |
| Poloxamer 407                                            | 188                                                                                                                                                                                                                                                                               | 75–85                   |                        |                         |               |     |       |  |     |        |
|                                                          | 407                                                                                                                                                                                                                                                                               | 95–105                  |                        |                         |               |     |       |  |     |        |
| Polysorbate 20<br>(Tween 20)                             | <br>( $w + x + y + z = 20$ )                                                                                                                                                                  |                         |                        |                         |               |     |       |  |     |        |
| Polysorbate 80<br>(Tween 80)                             | <br>( $w + x + y + z = 20$ )                                                                                                                                                                  |                         |                        |                         |               |     |       |  |     |        |
| Propylene glycol monocaprylate, type I<br>(Capryol PGMC) |                                                                                                                                                                                               |                         |                        |                         |               |     |       |  |     |        |
